# Supplementary material
Source: ML conference proceedings conference paper supplement (https://proceedings.mlr.press/v89/soma19a.html)
Supplement: Supplementary file [file soma19a-supp.pdf]

# Appendix of “No-regret algorithms for online $k$ -submodular maximization”

## A Omitted proofs in applications

### A.1 Coupled feature selection

It suffices to show that  $f$  satisfies the pairwise-monotonicity and orthant submodularity. The pairwise-monotonicity is immediate since  $f$  is a monotone function. For the orthant submodularity, we note that  $f$  decomposes into two functions:  $g(X_1, \dots, X_k) = H(X_1, \dots, X_k)$  and  $-\sum_{i \in [k]} \sum_{j \in X_i} H(Y_j | Z_i)$ . The latter term is simply modular and we can ignore it. For the former term, let us take  $X_i \subseteq X'_i$  ( $i \in [k]$ ) and  $j \in [n] \setminus (X'_1 \cup \dots \cup X'_k)$ . Let  $S = X_1 \cup \dots \cup X_k$  and  $S' = X'_1 \cup \dots \cup X'_k$ . Then, for any  $i$ ,

$$\begin{aligned} & \Delta_{j,i}g(X_1, \dots, X_k) + \Delta_{j,i}g(X'_1, \dots, X'_k) \\ &= H(S \cup j) - H(S) - H(S' \cup j) + H(S') \\ &\geq 0, \end{aligned}$$

since the entropy function  $H$  is submodular.

### A.2 Sensor placement with $k$ different sensors

Again, we show the pairwise-monotonicity and orthant submodularity. For the pairwise-monotonicity, let us fix  $(X_1, \dots, X_k) \in (k+1)^V$  and  $j \notin \cup_i X_i$ . Then, for arbitrary distinct  $i$  and  $i'$ ,

$$\begin{aligned} & \Delta_{j,i}f(X_1, \dots, X_k) + \Delta_{j,i'}f(X_1, \dots, X_k) \\ &= g(X_i \cup j) - g(X_i) + g(X_{i'} \cup j) - g(X_{i'}) \\ &= g(V \setminus (X_i \cup j)) + g(X_{i'} \cup j) - g(X_i) - g(X_{i'}) \\ &\geq g(V \setminus X_i) + g(X_{i'}) - g(X_i) - g(X_{i'}) \\ &= 0, \end{aligned}$$

by the symmetricity and submodularity of  $g$ . For the orthant submodularity, let us take  $X_i \subseteq Y_i$  ( $i \in [k]$ ) and  $j \in [n] \setminus (Y_1 \cup \dots \cup Y_k)$ . Then, for any  $i$ ,

$$\begin{aligned} & \Delta_{j,i}f(X_1, \dots, X_k) + \Delta_{j,i}f(Y_1, \dots, Y_k) \\ &= g(X_i \cup j) - g(X_i) - g(Y_i \cup j) + g(Y_i) \\ &\geq 0, \end{aligned}$$

by the submodularity of  $g$ .
